# Supplementary material for: Characterizing Isotopic Composition and Trajectories of Atmospheric River Events
Source: MDPI journal article supplement (doi:10.3390/atmos15010074), 2024-01-07

## Supplementary Material

**Table S1.** Satellite Imagery, Trajectory Models, and Isotopic Composition of Sampled AR Events

|                                                                                                                                                                                                                                                                                                              |                                                                                                                                                                                                                                                                                                             |                                                                                                                                                                                                                                                                                                                |
|--------------------------------------------------------------------------------------------------------------------------------------------------------------------------------------------------------------------------------------------------------------------------------------------------------------|-------------------------------------------------------------------------------------------------------------------------------------------------------------------------------------------------------------------------------------------------------------------------------------------------------------|----------------------------------------------------------------------------------------------------------------------------------------------------------------------------------------------------------------------------------------------------------------------------------------------------------------|
| 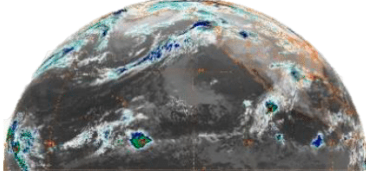<br><br><b>11/28/2021</b><br>$-8.7\text{‰ } \delta^{18}\text{O}$ , $-53\text{‰ } \delta^2\text{H}$<br>257.2 kg/m/s, 32.2 mm, 7.6°C         | <br><br><b>11/30/2021</b><br>$-11.8\text{‰ } \delta^{18}\text{O}$ , $-82\text{‰ } \delta^2\text{H}$<br>456.5 kg/m/s, 48.8 mm, 10.4°C      | <br><br><b>1/12/2022</b><br>$-13\text{‰ } \delta^{18}\text{O}$ , $-93\text{‰ } \delta^2\text{H}$<br>493.4 kg/m/s, 63.8 mm, 7.3°C           |
| <br><br><b>3/14/2022</b><br>$-10.54\text{‰ } \delta^{18}\text{O}$ , $-77.94\text{‰ } \delta^2\text{H}$<br>242.0 kg/m/s, 43.5 mm, 6.5°C  | <br><br><b>5/4/2022</b><br>$-11.42\text{‰ } \delta^{18}\text{O}$ , $-85.37\text{‰ } \delta^2\text{H}$<br>273.0 kg/m/s, 3.4 mm, 10.8°C  | <br><br><b>5/25/2022</b><br>$-7.2\text{‰ } \delta^{18}\text{O}$ , $-56.84\text{‰ } \delta^2\text{H}$<br>215.0 kg/m/s, 1.3 mm, 13°C      |
| <br><br><b>6/5/2022</b><br>$-14.13\text{‰ } \delta^{18}\text{O}$ , $-113.32\text{‰ } \delta^2\text{H}$<br>284.0 kg/m/s, 6.2 mm, 17.4°C | <br><br><b>6/9/2022</b><br>$-15.29\text{‰ } \delta^{18}\text{O}$ , $-120.1\text{‰ } \delta^2\text{H}$<br>262.2 kg/m/s, 9.7 mm, 13.4°C | <br><br><b>10/26/2022</b><br>$-8.45\text{‰ } \delta^{18}\text{O}$ , $-54.28\text{‰ } \delta^2\text{H}$<br>119.7 kg/m/s, 17.5 mm, 8.2°C |

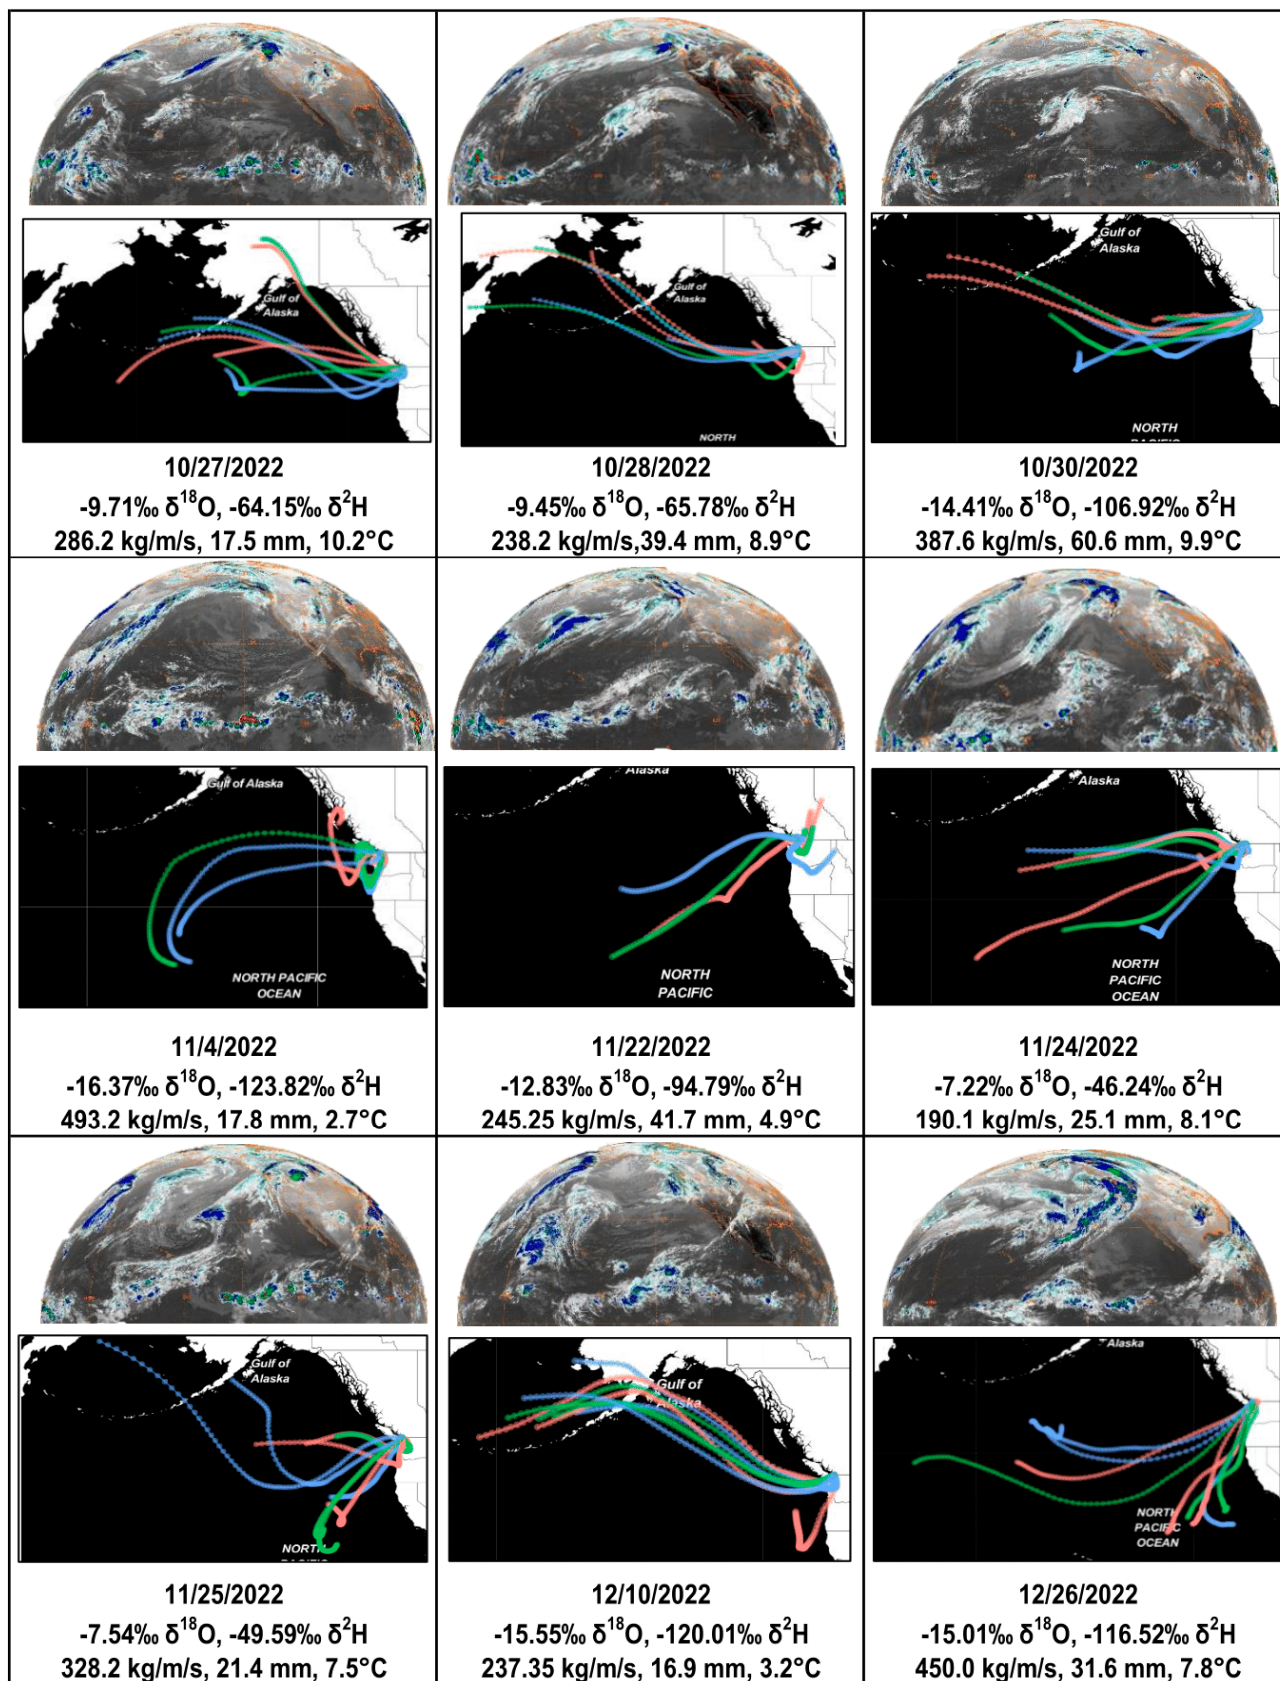

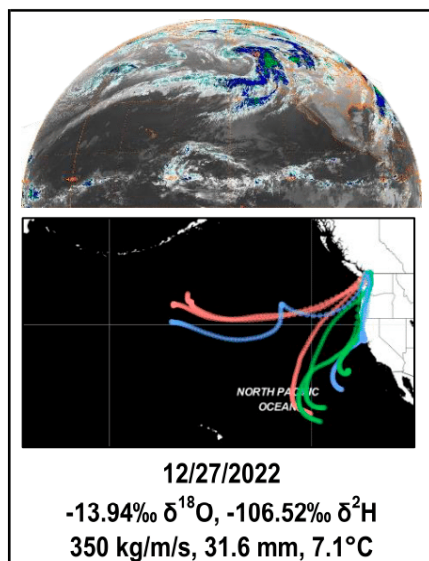

Supplement: s1 [file s1]
